# Supplementary material for: Non-carbon coating: a new strategy for improving lithium ion storage of carbon matrix
Source: Royal Society of Chemistry journal article supplement (doi:10.1039/c8gc01683f), 2018-01-01
Supplement: c8gc01683f1.pdf [file c8gc01683f1.pdf]

## Supporting Information

### **Non-Carbon Coating: A New Strategy for Improving Lithium Ion Storage of Carbon Matrix**

Lanju Sun, Wei liu \*, Yongpeng Cui, Yuan Zhang, Huanlei Wang, Shuang Liu, Baohong Shan

*Institute of Materials Science and Engineering, Ocean University of China, Qingdao  
266100, China.*

\*Email: [weiliu@ouc.edu.cn](mailto:weiliu@ouc.edu.cn)

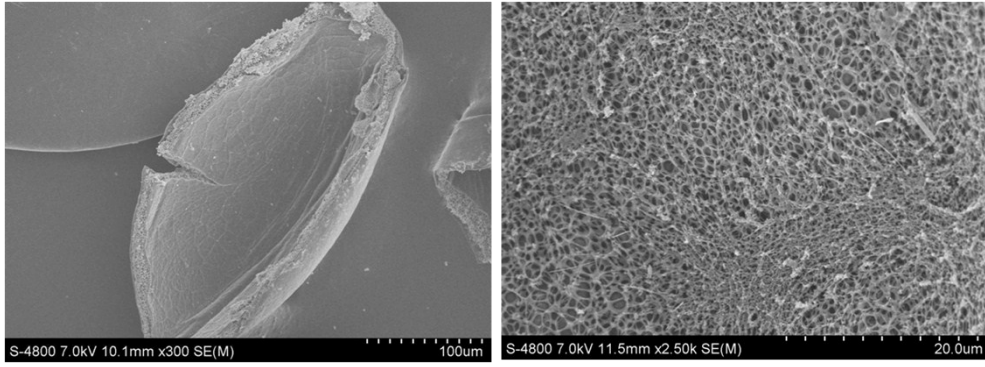

**Figure. S1.** SEM image of PBC

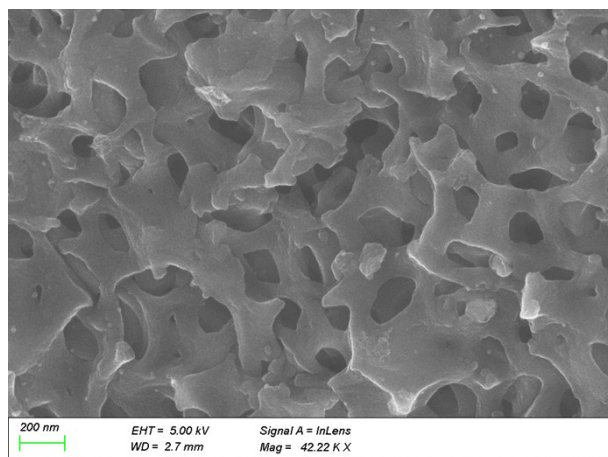

**Figure. S2.** SEM image of PBC@TC sample

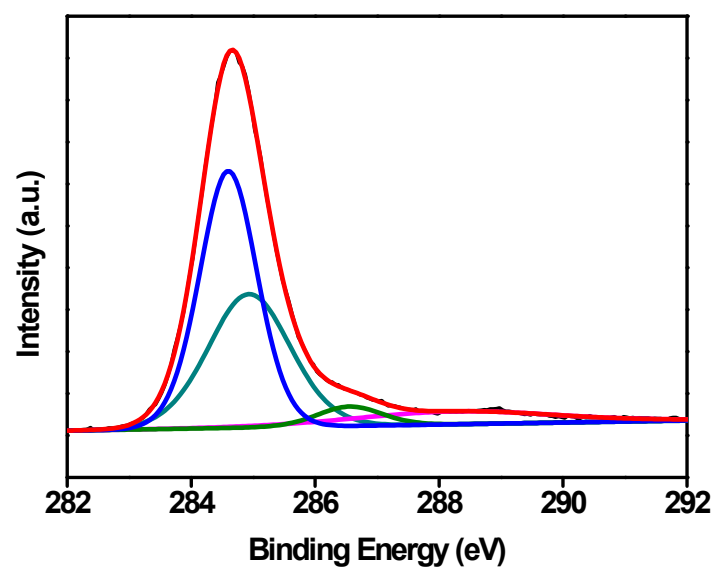

Figure. S3. The high-resolution XPS C1s spectra of PBC@TC .

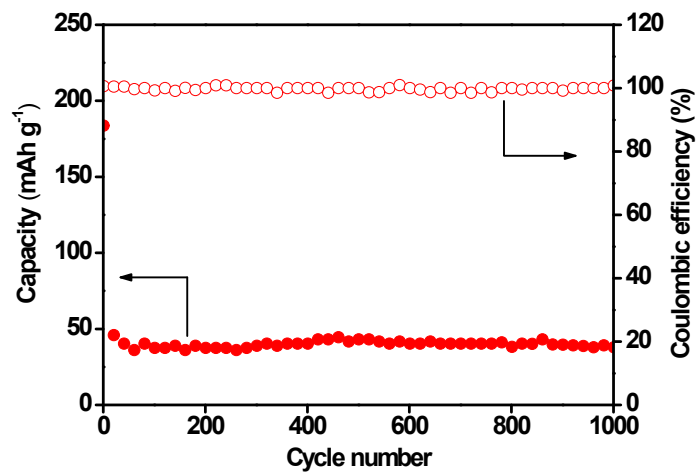

Figure. S4. The cycling performance and coulombic efficiency of TC at current density at 5 A g<sup>-1</sup>.

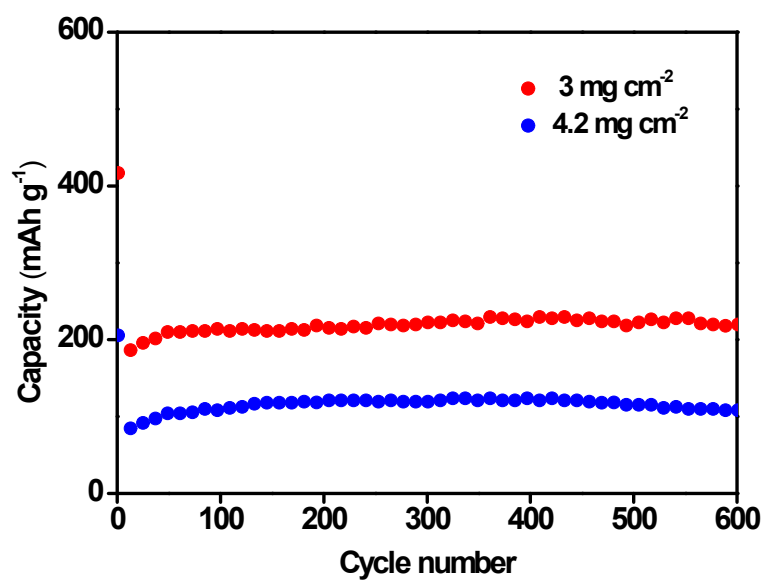

**Figure. S5.** The long-term cycle stability of the PBC@TC electrode at 5 A g<sup>-1</sup> using different mass loadings of PBC@TC.

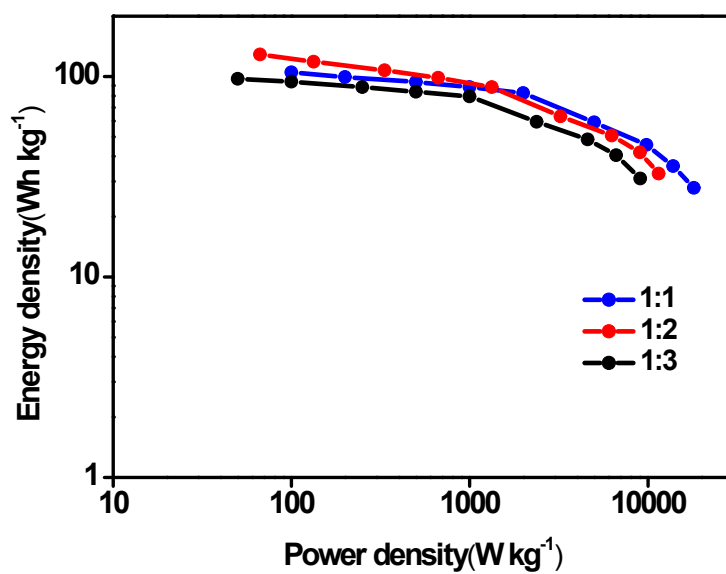

**Figure. S6.** Active mass normalized Ragone plots of AC//PBC@TC LICs based on total mass of the both cathode and anode tested between 0-4.0 V.

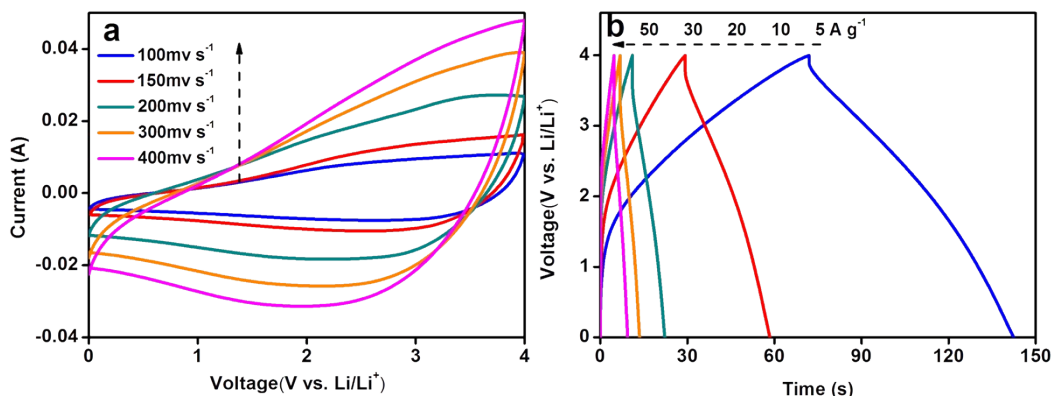

**Figure. S7.** (a) The CV curves of AC//PBC@TC LICs at various scan rates; (b) charge-discharge curves of AC//PBC@TC LICs at different current densities.



**Table S1.** Comparison with the performance of previously reported Li-ion capacitors

| LIC                                                           | energy density<br>(Wh kg <sup>-1</sup> ) | power density<br>(W kg <sup>-1</sup> ) | ref              |
|---------------------------------------------------------------|------------------------------------------|----------------------------------------|------------------|
| TiO <sub>2</sub> -carbon //AC                                 | 27.5                                     | 5000                                   | 1                |
|                                                               | 67.4                                     | 75                                     |                  |
| TiO <sub>2</sub> @CNT@C //AC                                  | 81.2                                     | 126                                    | 2                |
| TiC-carbon //AC                                               | 101.5                                    | 450                                    | 3                |
| carbon //AC                                                   | 83                                       | 128                                    | 4                |
|                                                               | 5718                                     | 41                                     |                  |
| carbon nanosheets//AC                                         | 64.2                                     | 56.3                                   | 5                |
|                                                               | 25.8                                     | 1357                                   |                  |
| Li <sub>4</sub> Ti <sub>5</sub> O <sub>12</sub> /graphene//AC | 50.3                                     | 225                                    | 6                |
|                                                               | 27.5                                     | 3000                                   |                  |
| Li <sub>2</sub> FeSiO <sub>4</sub> // AC                      | 43                                       | 200                                    | 7                |
| TiO <sub>2</sub> (reduced                                     | 42                                       | 800                                    | 8                |
| graphene oxide) //AC                                          | 8.9                                      | 8000                                   | 9                |
| GC1100/ /SFAC-2                                               | 104                                      | 143                                    | 10               |
|                                                               | 32                                       | 6628                                   |                  |
| <b>AC//PBC@TC</b>                                             | <b>132</b>                               | <b>66.6</b>                            | <b>This work</b> |
|                                                               | <b>32.7</b>                              | <b>11500</b>                           |                  |

## Notes and References

- 1 C. Yang, J. L. Lan, W. X. Liu, Y. Liu, Y. H. Yu and X. P. Yang, *ACS Applied Materials & Interfaces*, 2017, **9**, 18710-18719.
- 2 H. Wang, Y. Zhang, H. Ang, Y. Zhang, H. T. Tan, Y. Zhang, Y. Guo, J. B. Franklin, X. L. Wu, M. Srinivasan, H. J. Fan and Q. Yan, *Advanced Functional Materials*, 2016, **26**, 3082-3093.
- 3 H. Wang, D. Mitlin, J. Ding, Z. Li and K. Cui, *Journal of Materials Chemistry A*, 2016, **4**, 5149-5158.
- 4 Z. Yang, H. Guo, X. Li, Z. Wang, J. Wang, Y. Wang, Z. Yan and D. Zhang, *Journal of Materials Chemistry A*, 2017, **5**, 15302-15309.
- 5 Y. Ma, H. Chang, M. Zhang and Y. Chen, *Advanced Materials*, 2015, **27**, 5296-5308.
- 6 Y.-E. Zhu, L. Yang, J. Sheng, Y. Chen, H. Gu, J. Wei and Z. Zhou, *Advanced Energy Materials*, 2017, **7**, 1701222.
- 7 Z. Yang, H. Guo, X. Li, Z. Wang, Z. Yan and Y. Wang, *Journal of Power Sources*, 2016, **329**, 339-346.
- 8 H. Xu, X. Hu, Y. Sun, W. Luo, C. Chen, Y. Liu and Y. Huang, *Nano Energy*, 2014, **10**, 163-171.
- 9 K. Karthikeyan, V. Aravindan, S. B. Lee, I. C. Jang, H. H. Lim, G. J. Park, M. Yoshio and Y. S. Lee, *Journal of Alloys and Compounds*, 2010, **504**, 224-227.
- 10 Z. Le, F. Liu, P. Nie, X. Li, X. Liu, Z. Bian, G. Chen, H. B. Wu and Y. Lu, *ACS Nano*, 2017, **11**, 2952-2960.
